# Supplementary figures and images for: Artificial intelligence-enabled phenotyping of patients with severe aortic stenosis: on the recovery of extra-aortic valve cardiac damage after transcatheter aortic valve replacement
Source: HighWire-hosted journal article supplement (doi:10.1136/openhrt-2022-002068), 2022-10-01

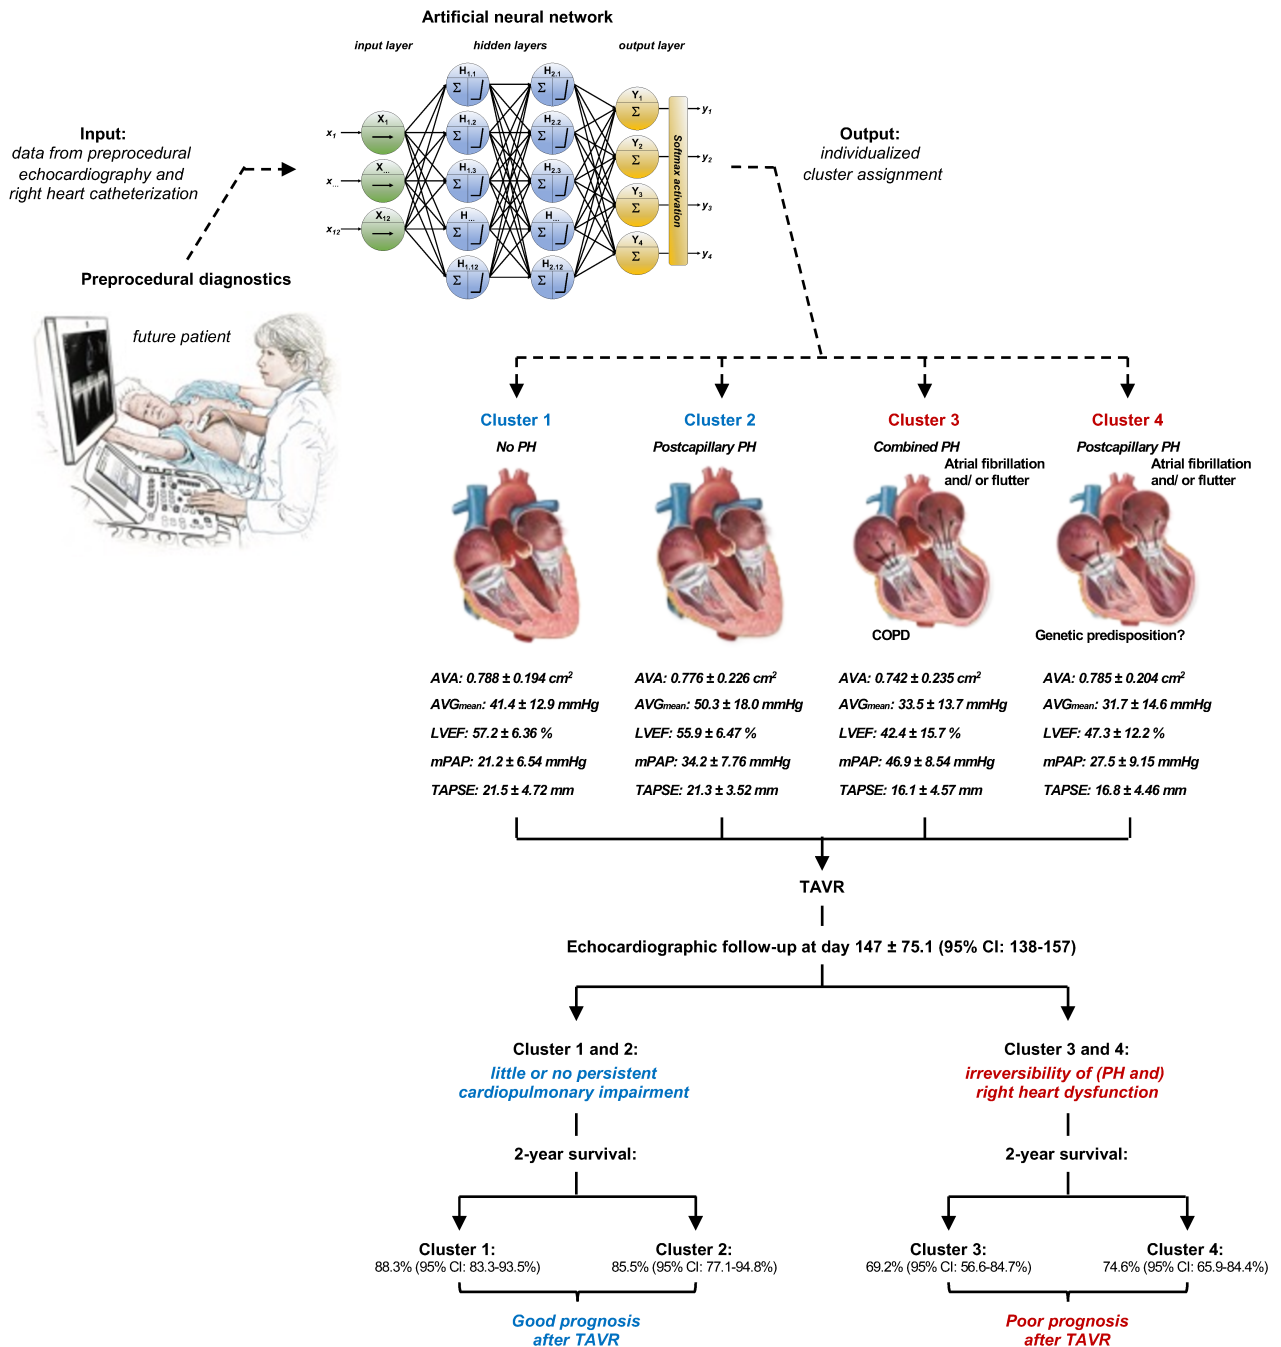

Supplement: openhrt-2022-002068supp002_data_supplement.pdf [file openhrt-2022-002068supp002_data_supplement.pdf]
